# Supplementary material
Source: PubMed Central journal article supplement (PMC2573268)
Supplement: supp_82_22_11294__1.pdf [file supp_82_22_11294__1.pdf]

**TABLE S1. AEC media components and concentrations**

| <b>Media</b> | <b>Components</b>        | <b>Source</b>                                       | <b>Concentration</b> |
|--------------|--------------------------|-----------------------------------------------------|----------------------|
| AEC basic    | DMEM/F-12                | Invitrogen Co., Ltd.<br>(Carlsbad, CA)              |                      |
|              | NaHCO <sub>3</sub>       | Nakarai Pharmaceutical Co., Ltd.                    | 1.2 mg/ml            |
|              | HEPES                    | Invitrogen Co., Ltd.                                | 3.6 mg/ml            |
|              | Penicillin               | Nakarai Pharmaceutical Co., Ltd.                    | 100 U/ml             |
|              | Streptomycin             | Nakarai Pharmaceutical Co., Ltd.                    | 100 µg/ml            |
|              | Glutamine                | Invitrogen Co., Ltd.                                | 2 mM                 |
|              | Amphotericin B           | Sigma-Aldrich                                       | 250 ng/ml            |
| AEC plus     | AEC basic                |                                                     |                      |
|              | Insulin                  | Sigma-Aldrich                                       | 10 µg /ml            |
|              | Transferrin              | Invitrogen Co., Ltd.                                | 5 µg /ml             |
|              | Cholera toxin            | Calbiochem Co., Ltd                                 | 0.1 µg /ml           |
|              | Epidermal growth factor  | Invitrogen Co., Ltd.                                | 25 ng/ml             |
|              | Bovine pituitary extract | Biomedical Technologies Inc.<br>(Stoughton, MA)     | 30 µg/ml             |
|              | Fetal bovine serum       | Equitech-Bio Co., Ltd<br>(Kerrville, TX)            | 5% (v/v)             |
|              | Retinoic acid            | Wako Chemical Co., Ltd.<br>(Osaka, Japan)           | 0.05 µM              |
|              | D-Valine                 | Tokyo Chemical Industry Co., Ltd.<br>(Tokyo, Japan) | 0.1 mg/ml            |

## **Figure Legend for Supplemental Figures**

### **FIG. S1. Validation of pAEpC isolation from porcine lung by the detection of an epithelial cell marker.**

Immunostaining of cytokeratin 19 as an epithelial cell marker and vimentin as a fibroblast marker (negative control) in pAEpC and porcine alveolar fibroblasts. The cells were prepared at the same time. Scale bars, 100  $\mu\text{m}$ .

### **FIG. S2. Caspase 3 activity in human lung carcinoma cell line A549 at 16 hpi with avian influenza virus.**

A549 cells were infected with H5N1, H5N2, or H5N3 at an MOI of 1. Caspase 3 activity (left panel) and cell morphology (right upper panel) at 16 hpi are shown. Virus antigen was detected by western blot analysis (right lower panel). Scale bar, 100  $\mu\text{m}$ .

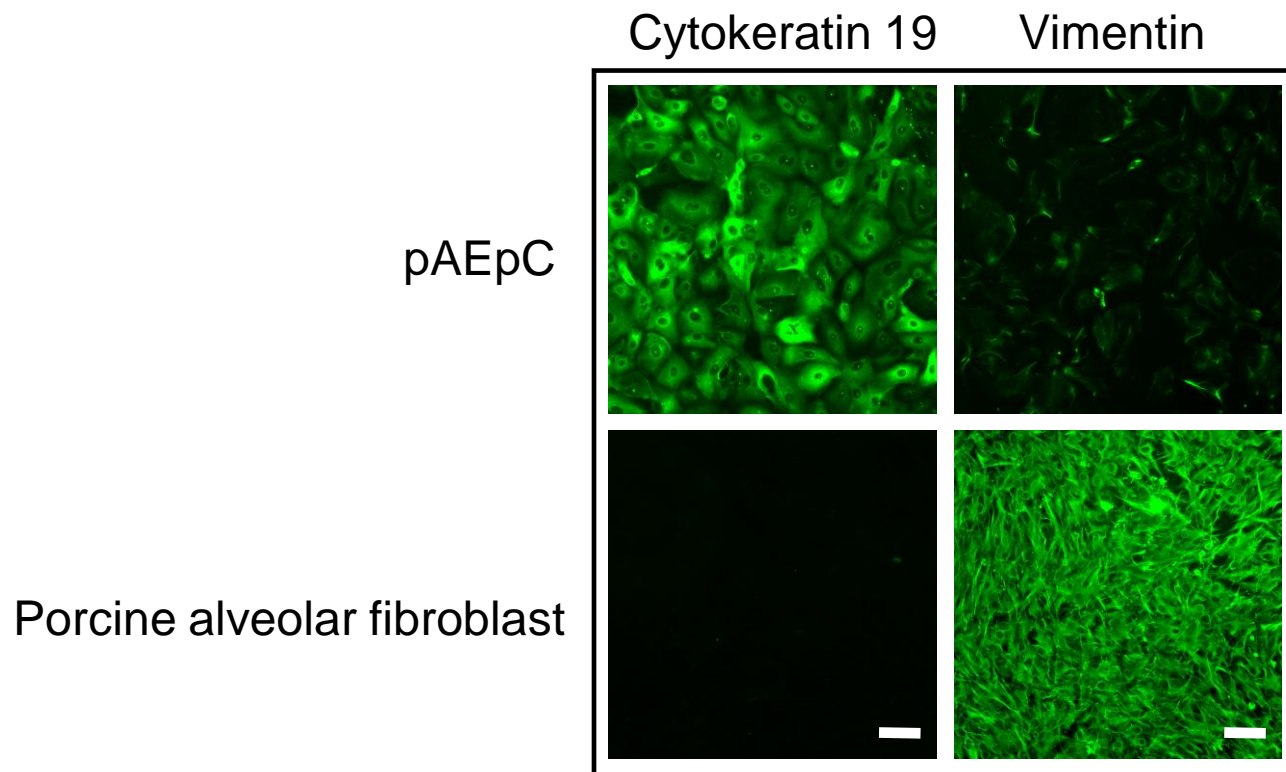

FIG. S1.

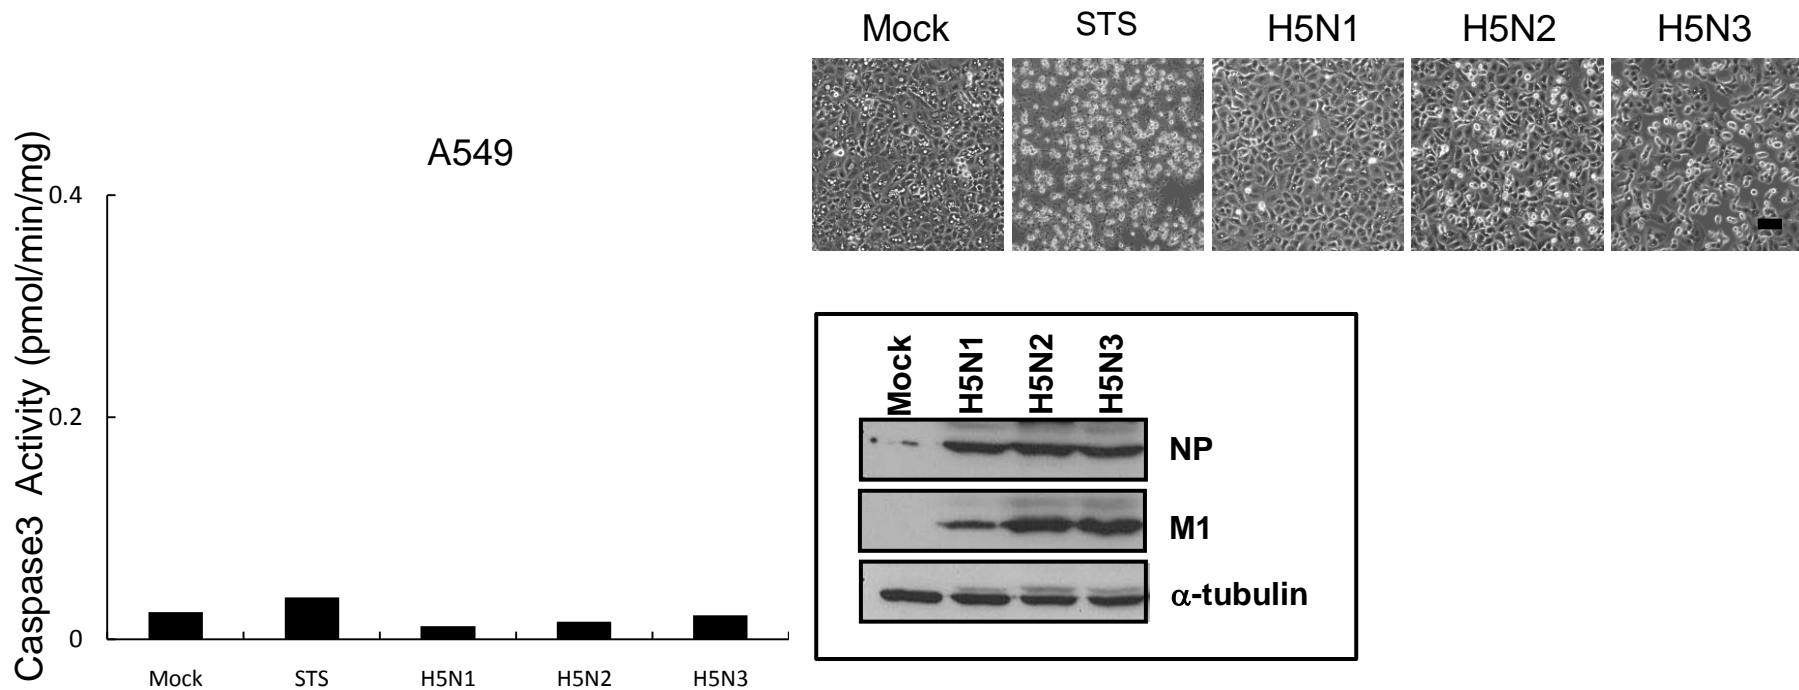

FIG. S2.
